# Supplementary material
Source: PubMed Central journal article supplement (PMC2544624)
Supplement: NIHMS64097-supplement-1si20060222_11.pdf [file NIHMS64097-supplement-1si20060222_11.pdf]

## Differential Inhibition of Group IVA and Group VIA Phospholipases A<sub>2</sub> by 2-Oxoamides

Daren Stephens,<sup>†,‡</sup> Efrosini Barbayianni,<sup>§,‡</sup> Violetta Constantinou-Kokotou,<sup>||</sup> Anna Peristeraki,<sup>||</sup> David A. Six,<sup>†</sup> Jennifer Cooper,<sup>†</sup>, Richard Harkewicz,<sup>†</sup> Raymond A. Deems,<sup>†</sup> Edward A. Dennis,<sup>\*,†</sup> and George Kokotos<sup>\*,§</sup>

<sup>†</sup>*Department of Chemistry and Biochemistry, University of California, San Diego, La Jolla, California 92093-0601* <sup>§</sup>*Laboratory of Organic Chemistry, Department of Chemistry, University of Athens, Panepistimiopolis, Athens 15771, Greece* <sup>||</sup>*Chemical Laboratories, Agricultural University of Athens, Athens 11855, Greece*

### Supporting information

Elemental analysis of synthesized compounds      pp. S2-S3

**Appendix.** Elemental analysis of synthesized compounds

| <b>Compound</b> | <b>Formula</b>     | <b>Mol. Weight</b> | <b>Calculated</b>               | <b>Found</b>                    |
|-----------------|--------------------|--------------------|---------------------------------|---------------------------------|
| <b>2a</b>       | $C_{16}H_{23}NO_4$ | 293.36             | C, 65.51<br>H, 7.90<br>N, 4.77  | C, 65.33<br>H, 8.06<br>N, 4.64  |
| <b>2b</b>       | $C_{17}H_{25}NO_4$ | 307.38             | C, 66.43<br>H, 8.20<br>N, 4.56  | C, 66.28<br>H, 8.36<br>N, 4.53  |
| <b>2c</b>       | $C_{24}H_{45}NO_4$ | 411.62             | C, 70.03<br>H, 11.02<br>N, 3.40 | C, 69.94<br>H, 11.29<br>N, 3.36 |
| <b>9</b>        | $C_{25}H_{47}NO_4$ | 425.64             | C, 70.54<br>H, 11.13<br>N, 3.29 | C, 70.32<br>H, 11.31<br>N, 3.19 |
| <b>4a</b>       | $C_{16}H_{21}NO_4$ | 291.34             | C, 65.96<br>H, 7.27<br>N, 4.81  | C, 65.85<br>H, 7.48<br>N, 4.76  |
| <b>4b</b>       | $C_{17}H_{23}NO_4$ | 305.37             | C, 66.86<br>H, 7.59<br>N, 4.59  | C, 66.74<br>H, 7.67<br>N, 4.54  |
| <b>5a</b>       | $C_{15}H_{19}NO_4$ | 277.32             | C, 64.97<br>H, 6.91<br>N, 5.05  | C, 64.78<br>H, 7.16<br>N, 5.01  |
| <b>5b</b>       | $C_{16}H_{21}NO_4$ | 291.34             | C, 65.96<br>H, 7.27<br>N, 4.81  | C, 65.77<br>H, 7.39<br>N, 4.72  |
| <b>4c</b>       | $C_{24}H_{43}NO_4$ | 409.60             | C, 70.37<br>H, 10.58            | C, 70.21<br>H, 10.72            |

|           |                    |        |                                 |                                 |
|-----------|--------------------|--------|---------------------------------|---------------------------------|
|           |                    |        | N, 3.42                         | N, 3.34                         |
| <b>11</b> | $C_{25}H_{45}NO_4$ | 423.63 | C, 70.88<br>H, 10.71<br>N, 3.31 | C, 70.69<br>H, 10.97<br>N, 3.22 |
| <b>10</b> | $C_{24}H_{43}NO_4$ | 409.60 | C, 70.37<br>H, 10.58<br>N, 3.42 | C, 70.18<br>H, 10.72<br>N, 3.39 |
| <b>3a</b> | $C_{15}H_{21}NO_4$ | 279.33 | C, 64.50<br>H, 7.58<br>N, 5.01  | C, 64.33<br>H, 7.71<br>N, 4.92  |
| <b>3b</b> | $C_{16}H_{23}NO_4$ | 293.36 | C, 65.51<br>H, 7.90<br>N, 4.77  | C, 65.37<br>H, 8.09<br>N, 4.72  |
| <b>8</b>  | $C_{24}H_{45}NO_4$ | 411.62 | C, 70.03<br>H, 11.02<br>N, 3.40 | C, 69.87<br>H, 11.24<br>N, 3.32 |
| <b>12</b> | $C_{23}H_{41}NO_4$ | 395.58 | C, 69.83<br>H, 10.45<br>N, 3.54 | C, 69.62<br>H, 10.56<br>N, 3.49 |
